# Supplementary material for: Self-Assembled Nanoparticles Based on Block-Copolymers of Poly(2-Deoxy-2-methacrylamido-d-glucose)/Poly(N-Vinyl Succinamic Acid) with Poly(O-Cholesteryl Methacrylate) for Delivery of Hydrophobic Drugs
Source: MDPI journal article supplement (doi:10.3390/ijms222111457), 2021-10-24
Supplement: s1 [file s1]

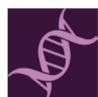

*Supplementary Materials*

# Self-Assembled Nanoparticles Based on Block-Copolymers of Poly(2-deoxy-2-methacrylamido-D-glucose)/Poly(*N*-vinyl succinamic acid) with Poly(*O*-cholesteryl methacrylate) for Delivery of Hydrophobic Drugs

Mariia Levit <sup>1</sup>, Alena Vdovchenko <sup>2</sup>, Apollinariia Dzhuzha <sup>1,2</sup>, Natalia Zashikhina <sup>1</sup>, Elena Katernyuk <sup>1,2</sup>, Alexey Gostev <sup>3</sup>, Eugene Sivtsov <sup>1,3</sup>, Antonina Lavrentieva <sup>4</sup>, Tatiana Tennikova <sup>2</sup> and Evgenia Korzhikova-Vlakh <sup>1,\*</sup>

<sup>1</sup> Institute of Macromolecular Compounds, Russian Academy of Sciences, Bolshoy pr. 31, 199004 St. Petersburg, Russia

<sup>2</sup> Institute of Chemistry, Saint-Petersburg State University, Universitetskiy pr. 26, 198504 St. Petersburg, Russia

<sup>3</sup> Saint-Petersburg State Institute of Technology, Technical University, Moskovskiy pr. 26, 190013 St. Petersburg, Russia

<sup>4</sup> Institute of Technical Chemistry, Gottfried-Wilhelm-Leibniz University of Hannover, 30167 Hannover, Germany

\* Correspondence: vlakh@hq.macro.ru

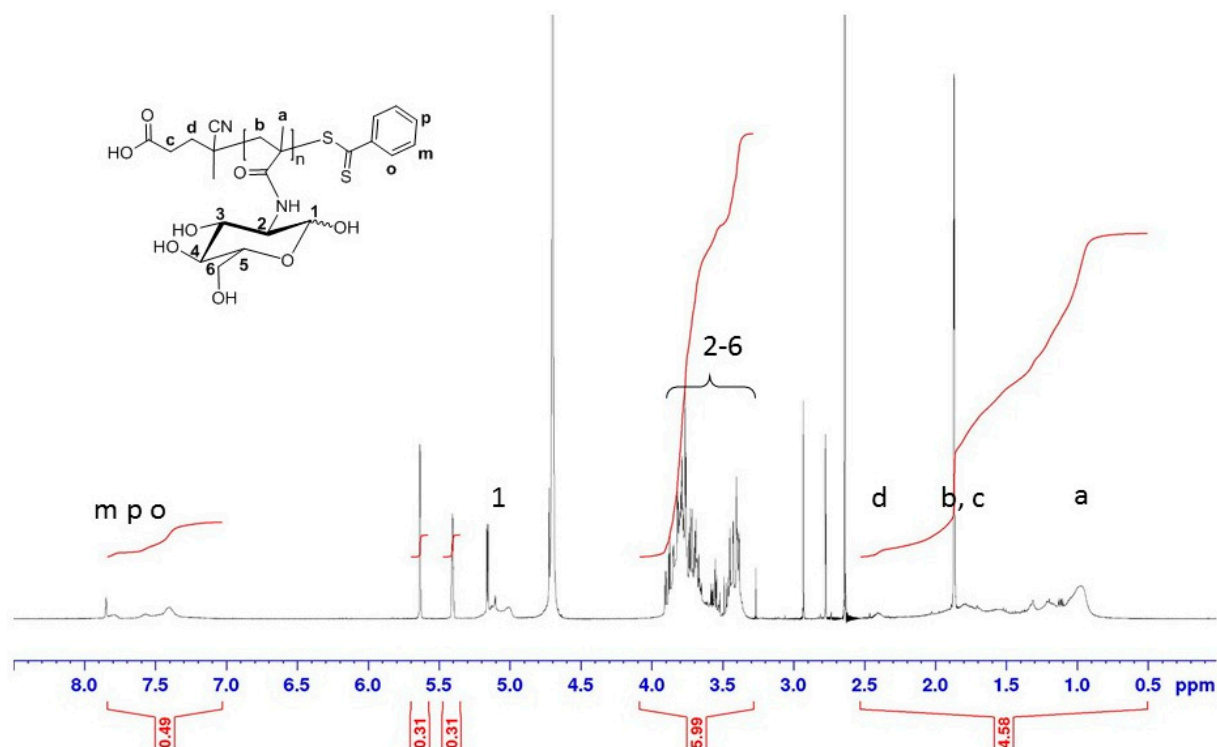

**Figure S1.** <sup>1</sup>H NMR spectrum (400 MHz, D<sub>2</sub>O, 25 °C) of PMAG-DTB.

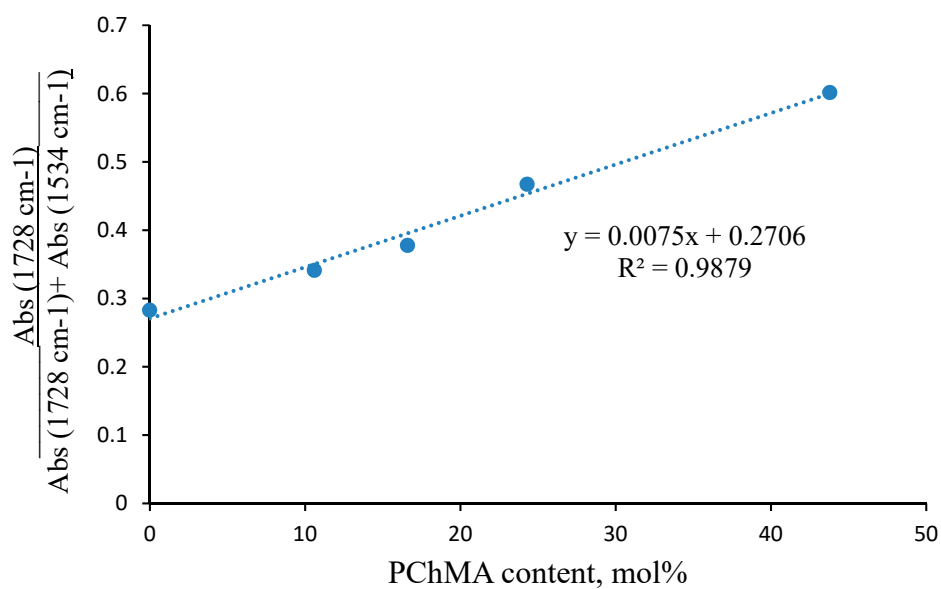

**Figure S2.** Calibration plot built for the mixture of PMAG and PChMA homopolymers, and used for the determination of PChMA content in the PMAG-*b*-PChMA.

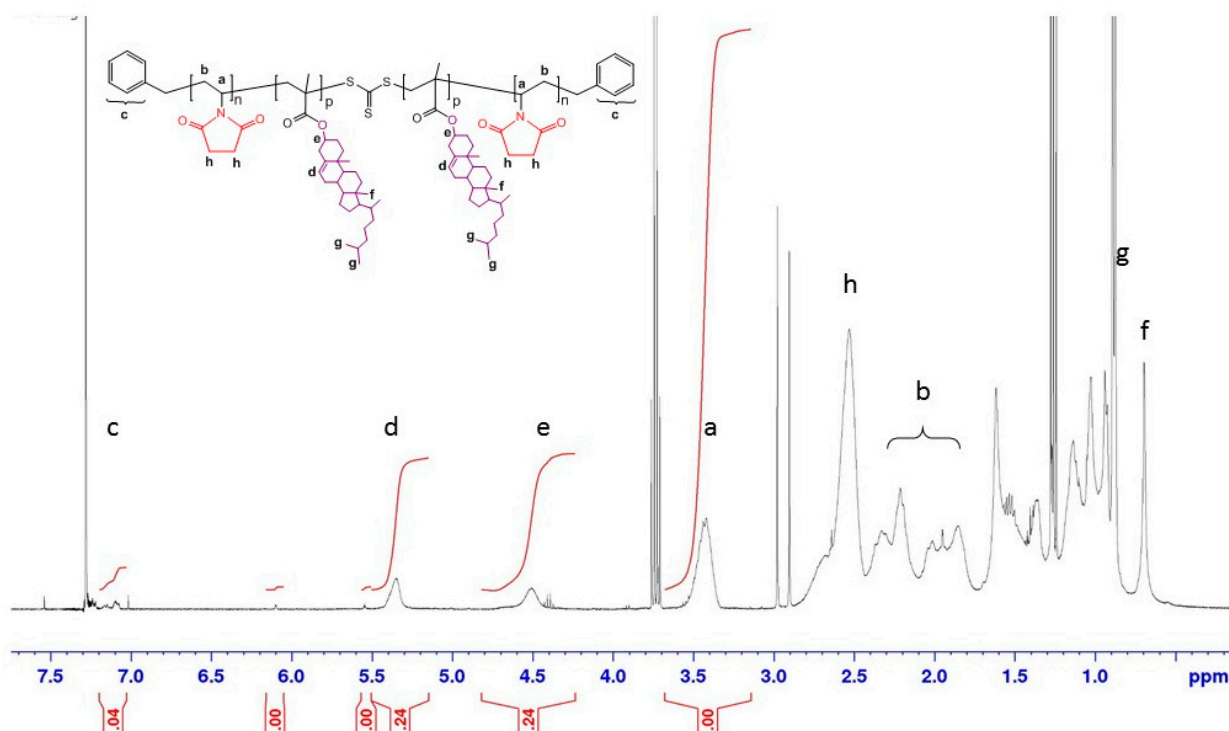

**Figure S3.** <sup>1</sup>H NMR spectrum (400 MHz, CDCl<sub>3</sub>, 25 °C) of block-copolymer PVSI-*b*-PChMA-*b*-PVSI (#2).
